# Supplementary material for: An Efficient and Comprehensive Strategy for Genetic Diagnostics of Polycystic Kidney Disease
Source: PLOS journal article supplement (doi:10.1371/journal.pone.0116680), 2015-02-03
Supplement: S4 (10.1371/journal.pone.0116680.s004) [file journal.pone.0116680.s004]

Figure S3

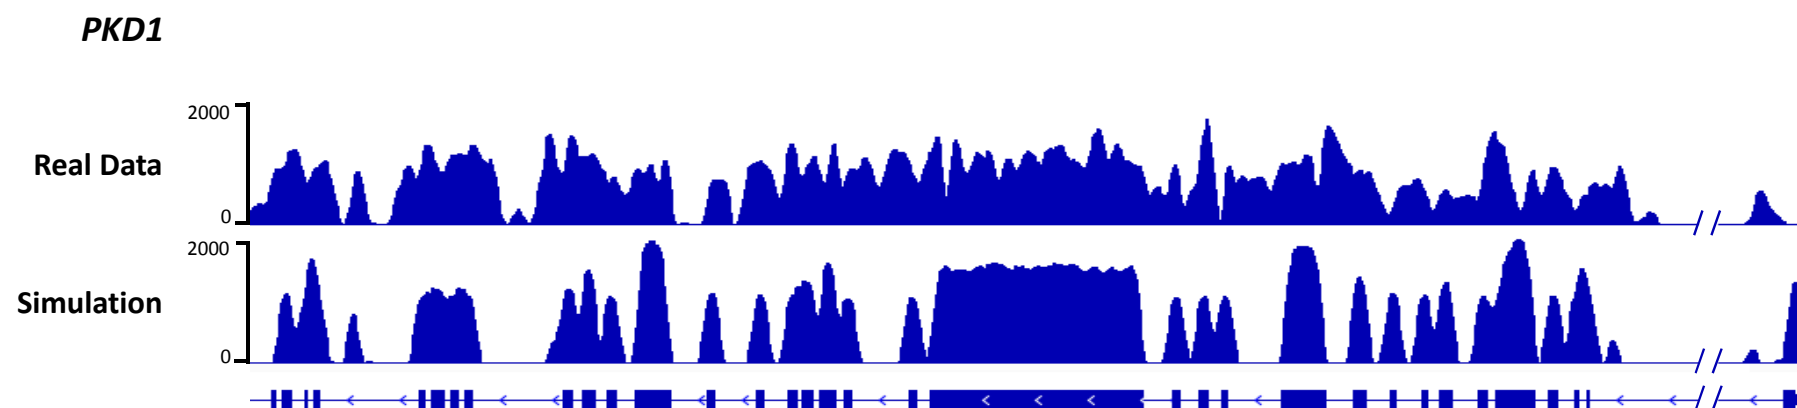

**Figure S3. Coverage plots for real *PKD1* data and for variant simulation data by Wgsim in the duplicated region (exons 1-33).**

In the real dataset (upper plot) also intronic regions targeted by the probe design are partially covered, whereas read simulation (lower plot) was only performed for exonic regions in the duplicated *PKD1* region. Some spurious alignment from pseudogene regions is visible in the large intron 1 maybe due to repetitive sequence segments. *PKD1* is displayed from the right to the left.
